# Supplementary material for: Novel Pharmacological Treatment Options in Pediatric Glioblastoma—A Systematic Review
Source: MDPI journal article supplement (doi:10.3390/cancers14112814), 2022-06-06
Supplement: s1 [file Table S1.pdf › Table S1.pdf]

Supplementary Data:

# Novel Pharmacological Treatment Options in Pediatric Glioblastoma—A Systematic Review

Johanna Wyss <sup>1,2,\*</sup>, Nicole Alexandra Frank <sup>3,†</sup>, Jehuda Soleman <sup>3,4,5,†</sup> and Katrin Scheinemann <sup>1,6,7,†</sup>

**Table S1.** Predefined parameters according to PICO for evidence-based medicine.

| Population                                  | Intervention                                              | Comparison         | Outcome      |
|---------------------------------------------|-----------------------------------------------------------|--------------------|--------------|
| Pediatric patients with GBM; age 0–18 years | Pharmacological treatment other than monotherapy with TMZ | No comparison (NA) | OS; PFS; EFS |

GBM = glioblastoma, TMZ = temozolomide, NA = not applicable, OS = overall survival, PFS = progression free survival, EFS = event free survival.
